# Supplementary material
Source: publisher site journal article supplement (https://www.dovepress.com/article/376005)
Supplement: Supplementary file 1 [file get_supplementary_file.php]

**The epidemiology, treatment patterns and economic burden of different phenotypes of Multiple Sclerosis in Italy: relapsing-remitting Multiple Sclerosis and secondary progressive Multiple Sclerosis**

Valentina Perrone1*, Chiara Veronesi1, Elisa Giacomini1, Rita Citraro2, Stefania Dell’Orco3, Fabio Lena4, Arrigo Paciello5, Anna Maria Resta6, Mihaela Nica7, Daniela Ritrovato7, Luca Degli Esposti1

1Clicon S.r.l. Società Benefit, Health Economics & Outcomes Research, Bologna, Italy

2Dipartimento di Scienze della Salute, Università Magna Grecia di Catanzaro, Unita’ Operativa di Farmaco-logia Clinica e Farmacovigilanza, Azienda Ospedaliero-Universitaria “Mater Domini”, Catanzaro, Italy

3ASL Roma 6, Albano Laziale, Roma, Italy

4USL Toscana Sud Est, Grosseto, Italy

5ATS Bergamo, Bergamo, Italy

6Struttura Complessa di Farmacia Territoriale Area Vasta 1, Fano, Italy

7Novartis Farma S.p.A, Origgio, Varese, Italy

**Supplementary Table 1. List of DMTs indicated for MS**

| **Molecule** | **ATC code** |
| --- | --- |
| alemtuzumab | L04AA34 |
| daclizumab | L04AC01 |
| dimethyl fumarate | N07XX09 |
| fingolimod | L04AA27 |
| glatiramer acetate | L03AX13 |
| interferon-beta-1a | L03AB07 |
| interferon-beta-1b | L03AB08 |
| mitoxantrone | L01DB07 |
| natalizumab | L04AA23 |
| ocrelizumab | L04AA36 |
| peginterferon beta-1a | L03AB13 |
| teriflunomide | L04AA31 |
| cladribine | L01BB04 |

**Supplementary Table 2. Median costs during follow-up in overall alive patients, stratified by treatment**

|  | **MS** | | **RRMS** | | **SPMS** | |
| --- | --- | --- | --- | --- | --- | --- |
|  | ***Untreated*** | ***Treated*** | ***Untreated*** | ***Treated*** | ***Untreated*** | ***Treated*** |
| Drug costs, median | 318 | 9690 | 237 | 9627 | 852 | 11168 |
| Hospitalization costs, median | 0 | 0 | 0 | 0 | 0 | 0 |
| Outpatient service costs, median | 335 | 614 | 321 | 609 | 498 | 757 |
| Total costs, median | 1196 | 10671 | 995 | 10567 | 2874 | 13306 |

**Institutional Review Board Statement**: The study was conducted according to the guidelines of the Declaration of Helsinki, and approved by the following Institutional Review Board (or Ethics Committees): (i) Comitato Etico di Bergamo, Bergamo, Italy (Prot. 224/19 of 14/11/2019); (ii) Comitato Etico Lazio 2, Roma, Italy (Prot. 0201651 of 13/11/2019); (iii) Comitato Etico Regionale delle Marche, Ancona, Italy (Prot. 2020_60 of 01/04/2020); (iv) Comitato Etico Sezione area Centro_Regione Calabria, Catanzaro, Italy (Prot n. 313 of 21/11/2019); (v) Comitato Etico di Area Vasta Sudest, Grosseto, Italy (Prot. 164 of 20/11/2019).
